# Supplementary material for: Selective Grafting of Protease-Resistant Adhesive Peptides on Titanium Surfaces
Source: MDPI journal article supplement (doi:10.3390/molecules27248727), 2022-12-09
Supplement: s1 [file s1]

## Supplementary Materials

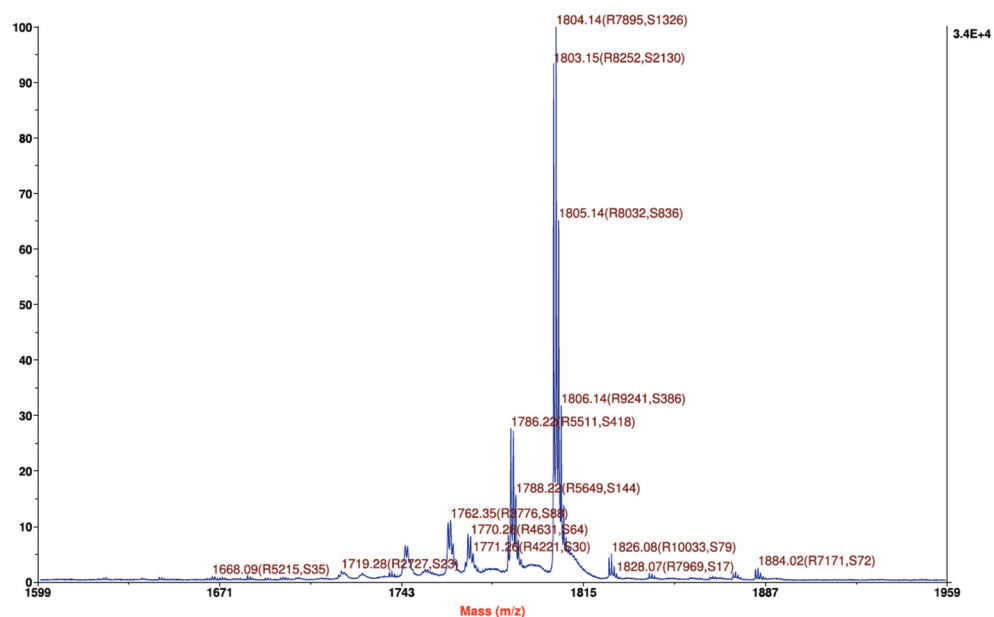

**Figure S1.** Mass Spectra of DHVPX peptide. The identity of the pure peptide was ascertained by Mass Spectrometry; experimental mass: 1804.14 Da, theoretical mass: 1803.20 Da (4800 MALDI-TOF/TOF TM analyzer provided with 4000 Series Explorer TM software, Applied Biosystem/MDS Sciex, CA, USA).

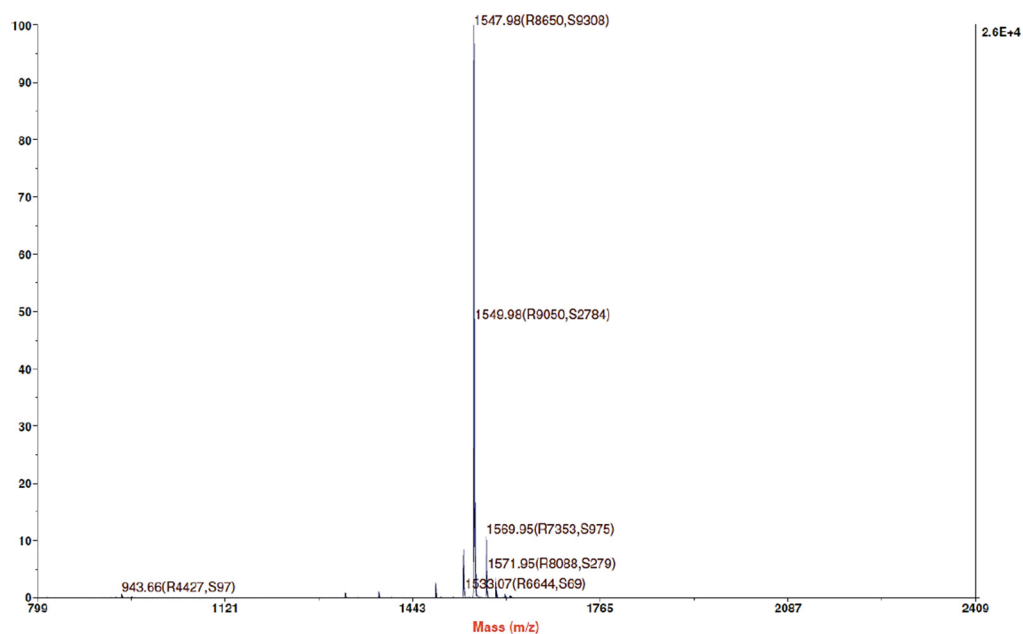

**Figure S2.** Mass Spectra of A-DHVPX peptide. The identity of the pure peptide was ascertained by Mass Spectrometry; experimental mass: 1547.98 Da, theoretical mass: 1545.76 Da (4800 MALDI-TOF/TOF TM analyzer provided with 4000 Series Explorer TM software, Applied Biosystem/MDS Sciex, CA, USA).

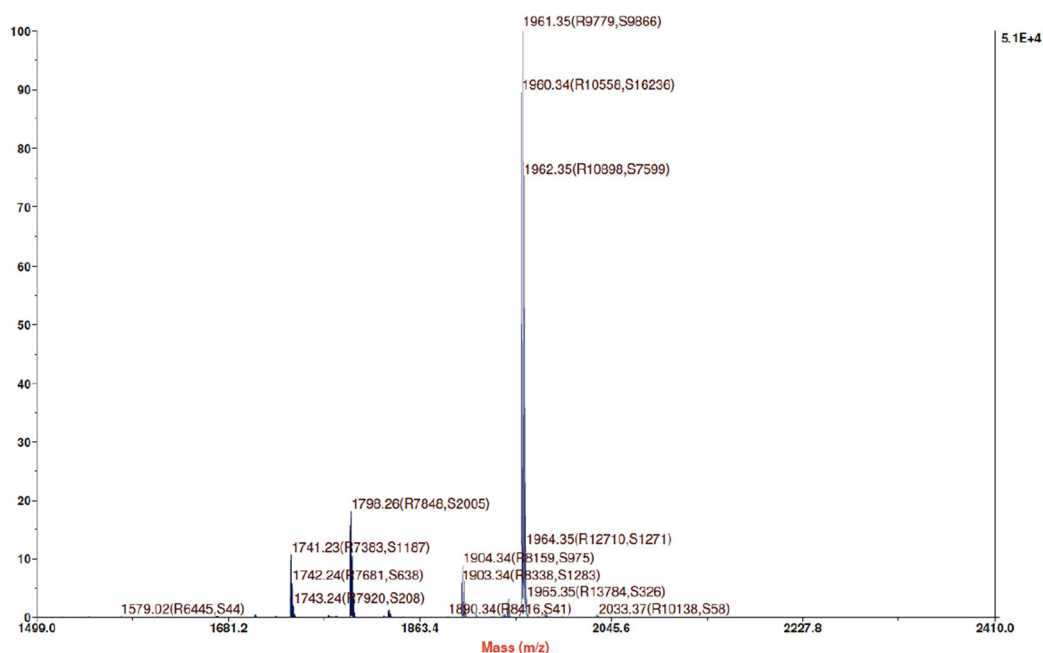

**Figure S3.** Mass Spectra of A-DHVPX-TAMRA peptide. The identity of the pure peptide was ascertained by Mass Spectrometry; experimental mass: 1961.35 Da, theoretical mass: 1960.21 Da (4800 MALDI-TOF/TOF TM analyzer provided with 4000 Series Explorer TM software, Applied Biosystem/MDS Sciex, CA, USA).

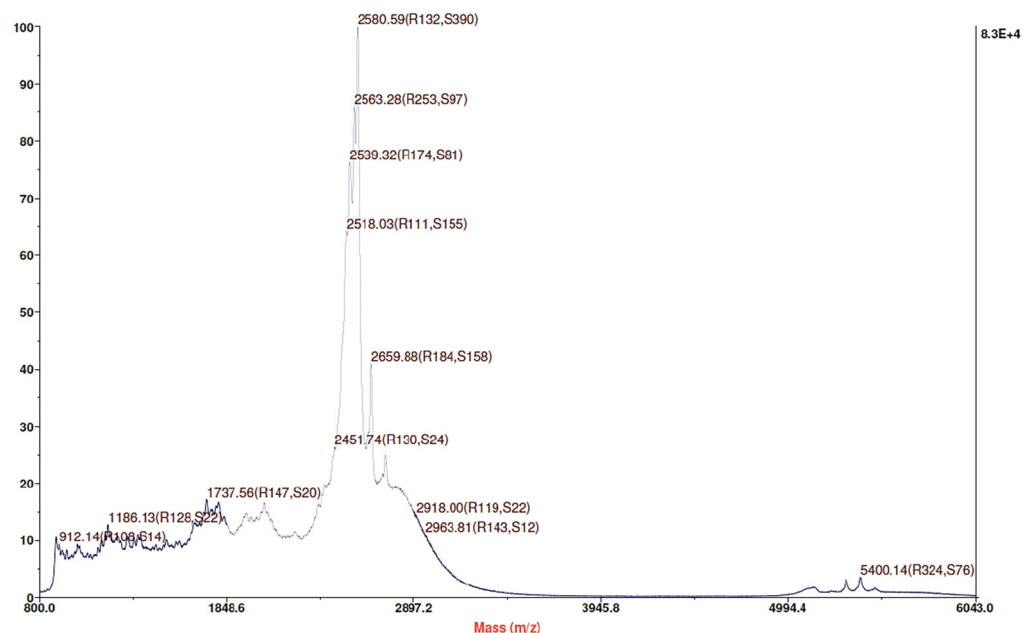

**Figure S4.** Mass Spectra of D2HVP peptide. The identity of the pure peptide was ascertained by Mass Spectrometry; experimental mass: 2580.59 Da, theoretical mass: 2579.97 Da (4800 MALDI-TOF/TOF TM analyzer provided with 4000 Series Explorer TM software, Applied Biosystem/MDS Sciex, CA, USA).

### 1S. TPM Calibration curve

A calibration curve was constructed by reading the signals emitted by different A-DHVPX-TAMRA aqueous solutions (10  $\mu$ L) at concentrations of 1 nM, 100 nM, 1  $\mu$ M, 10  $\mu$ M, and 100  $\mu$ M, respectively and subtracting the background signal of pure H<sub>2</sub>O (Figure S5). Only one measurement per concentration was performed, considering focal volumes with a 484  $\mu$ m square base (ROI) and 2  $\mu$ m height (resolution in z). Eventually, the interpolation line with its equation has been calculated.

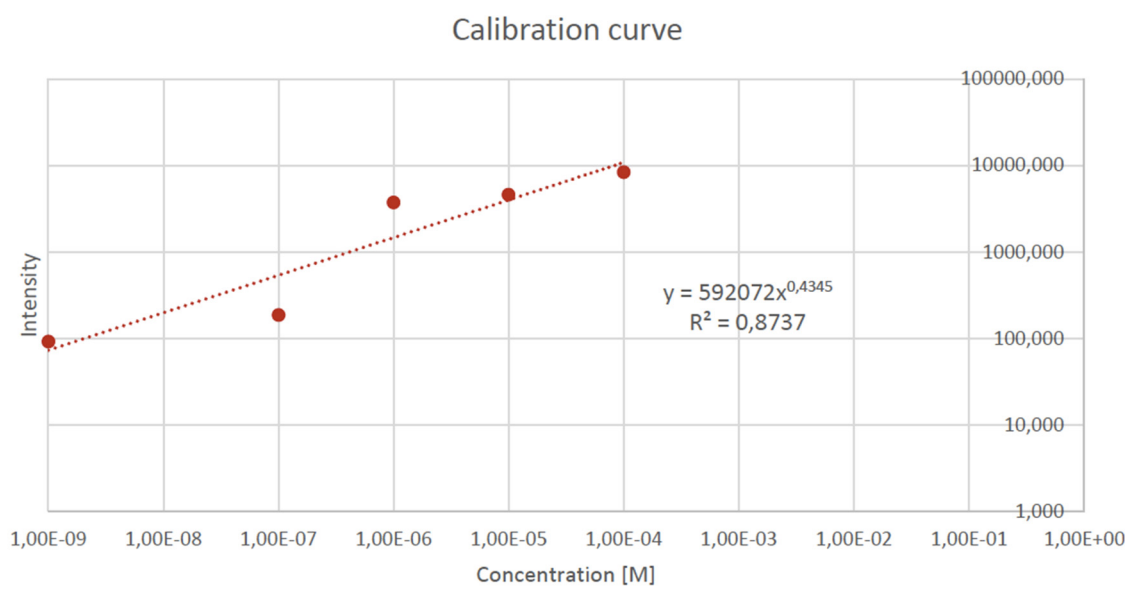

**Figure S5.** TPM calibration curve.
